# Supplementary material for: Genomic Landscape of Atypical Adenomatous Hyperplasia Reveals Divergent Modes to Lung Adenocarcinoma
Source: Oxford University Press journal article supplement (doi:10.1158/0008-5472.can-17-1605), 2017-09-26
Supplement: 00085472can171605-sup-184065_2_supp_4280424_jwkjcx.pdf [file 00085472can171605-sup-184065_2_supp_4280424_jwkjcx.pdf]

# **Genomic landscape of atypical adenomatous hyperplasia reveals divergent modes to lung adenocarcinoma**

Smruthy Sivakumar, F. Anthony San Lucas, Tina L. McDowell, Wenhua Lang, Li Xu, Junya Fujimoto, Jianjun Zhang, P. Andrew Futreal, Junya Fukuoka, Yasushi Yatabe, Steven M. Dubinett, Avrum E. Spira, Jerry Fowler, Ernest T. Hawk, Ignacio I. Wistuba, Paul Scheet\*, Humam Kadara\*

\*Equally contributing co-corresponding authors

## **SUPPLEMENTARY FIGURES**

Figure S1

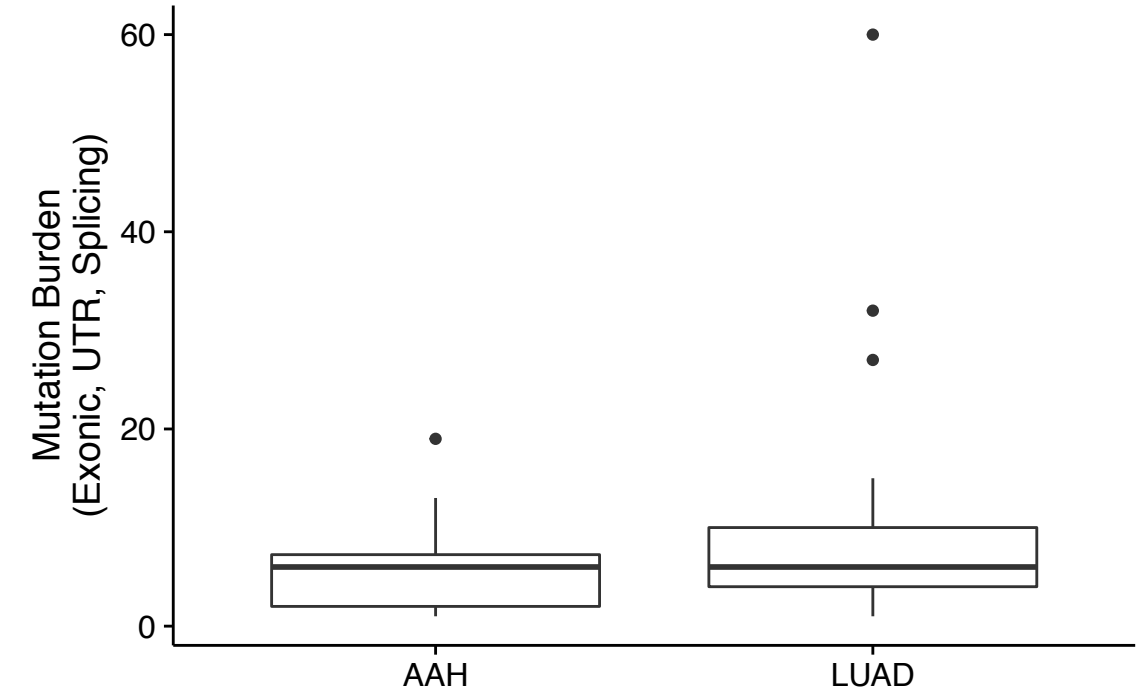

Figure S2

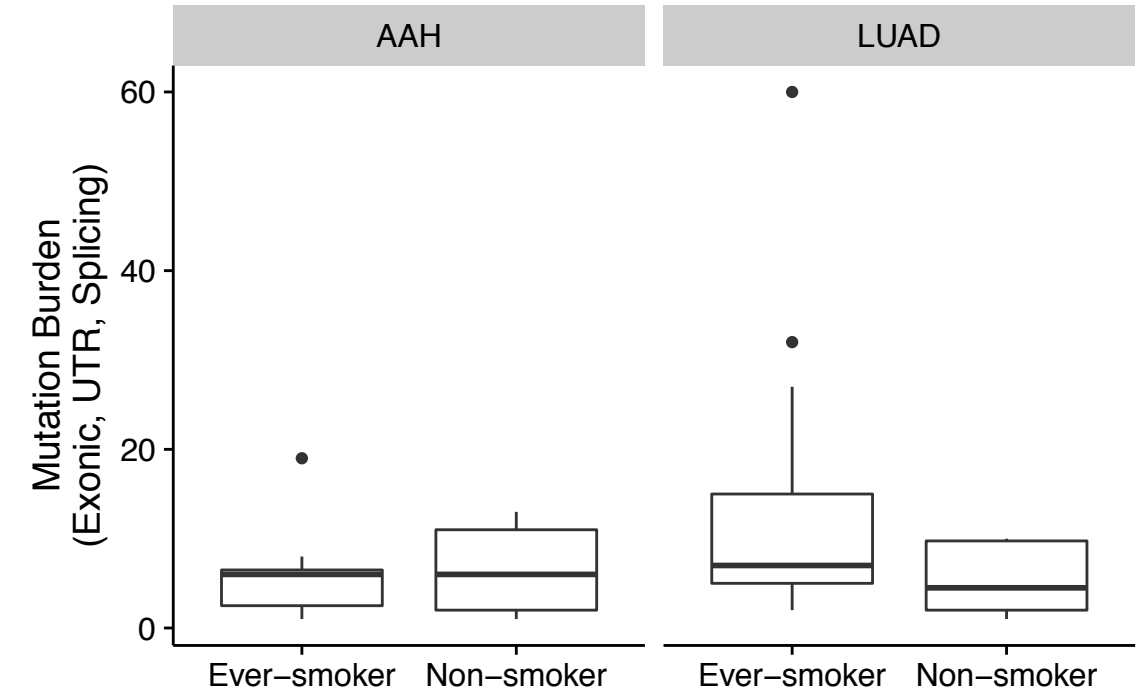

Figure S3

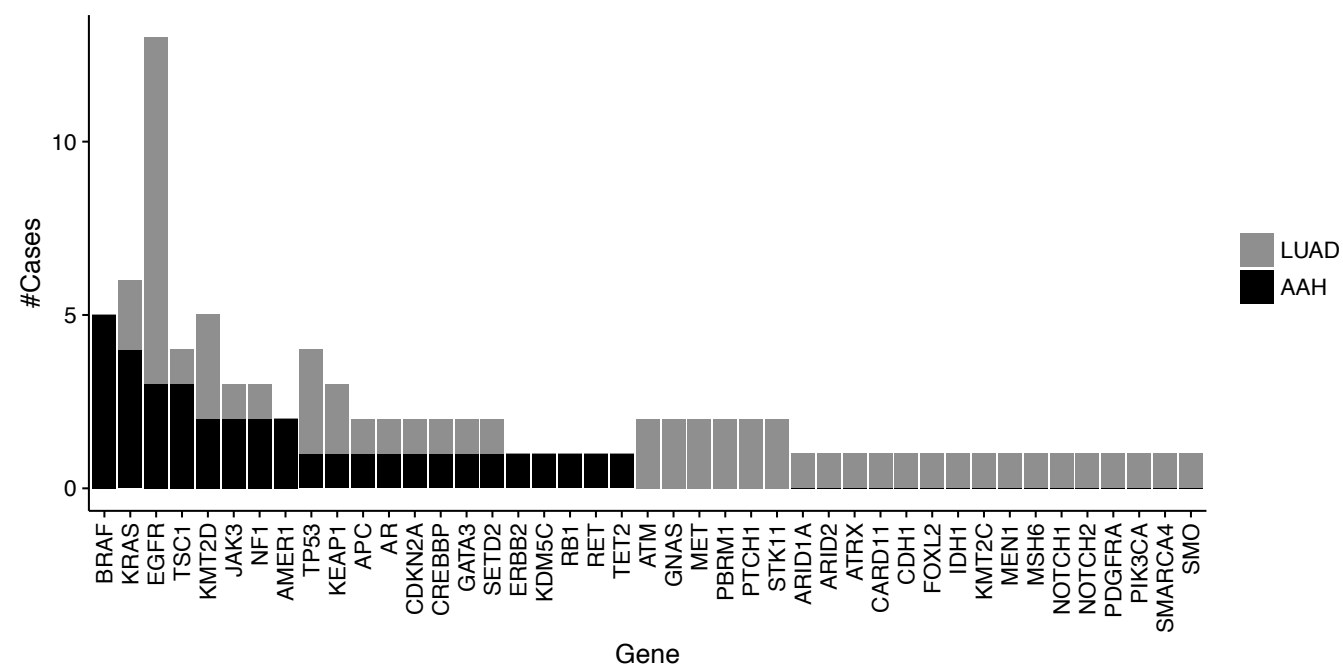

Figure S4

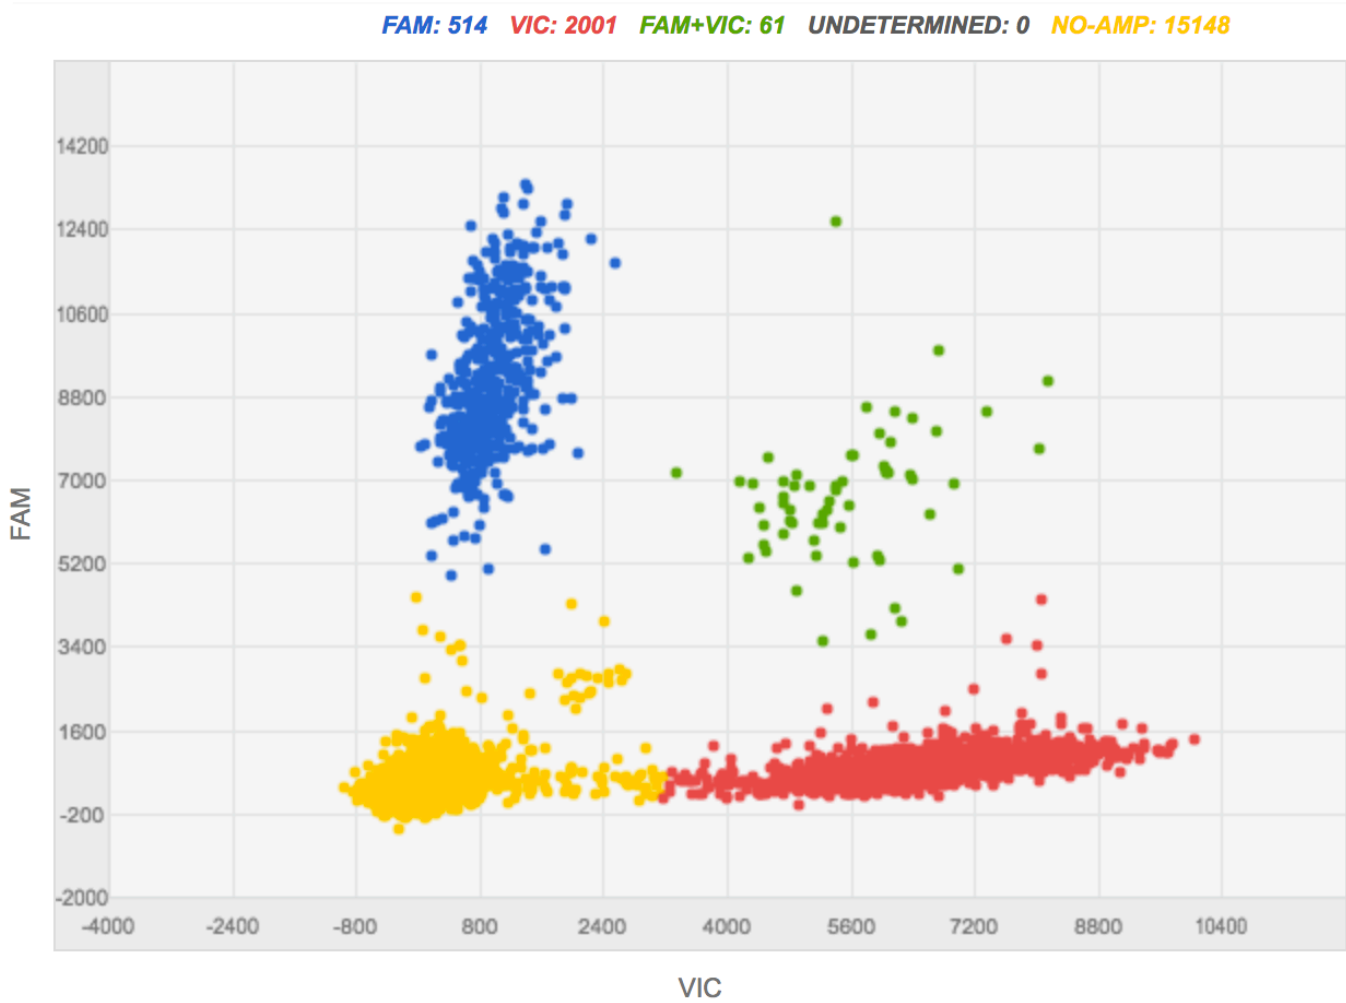

## SUPPLEMENTARY FIGURE LEGENDS

### **Figure S1. Mutation burden in atypical adenomatous hyperplasia and lung adenocarcinoma.**

Somatic point mutations in exonic, splicing and UTR regions within the 409 genes sequenced in the panel were identified for the 45 specimens (22 AAH and 23 LUAD) as described in the Materials and Methods section. Mutation burdens for AAH and LUAD were plotted.

**Figure S2. Mutation burden in atypical adenomatous hyperplasia and lung adenocarcinoma based on tobacco history.** Analysis of somatic mutations was performed as described in Figure S1 and in the Materials and Methods section. Specimens (AAH and LUAD) were classified based on tobacco history (non-smoker and ever-smoker) in all 22 patients. Mutation burdens for AAH and LUAD were plotted.

**Figure S3. Mutation in cancer driver genes in atypical adenomatous hyperplasia and lung adenocarcinoma.** For the genes previously established to be significantly mutated in lung adenocarcinomas [1] as well as other known cancer associated genes [2], we identified the distribution of number of AAH and LUAD specimens exhibiting mutations in these genes. The genes are sorted on two levels - first by the number of cases in AAH, followed by the number of cases in LUAD.

**Figure S4. An example result of digital PCR used to validate somatic mutations.** An example screenshot of the validation of the *BRAF* p.K601E mutation in a single sample using digital PCR is shown. In the scatter plot, the x-axis shows fluorescence of the reference allele probe in the VIC fluorophore channel, and the y-axis shows the fluorescence of the alternate allele probe in the FAM fluorophore channel. *BRAF*, *KRAS* and *EGFR* mutations were detected on the QuantStudio 3D Digital PCR System and their allele frequencies were inferred from the QuantStudio 3D AnalysisSuite Cloud Software.

## REFERENCES

1. Cancer Genome Atlas Research Network. Comprehensive molecular profiling of lung adenocarcinoma. *Nature*. 2014;511: 543–550.
2. Vogelstein B, Papadopoulos N, Velculescu VE, Zhou S, Diaz LA, Kinzler KW. Cancer Genome Landscapes. *Science*. 2013;339: 1546–1558.
